# Supplementary material for: Association of Urinary Biomarkers of Smoking-Related Toxicants with Lung Cancer Incidence in Smokers: The Multiethnic Cohort Study
Source: Oxford University Press journal article supplement (doi:10.1158/1055-9965.epi-22-0569), 2022-11-09
Supplement: epi-22-0569_supplementary_table_2.suppst2.xlsx [file epi-22-0569_supplementary_table_2.suppst2.xlsx]

## Sheet: ST2 ASIR
Supplementary Table 2. Age-standardized incidence rates (ASIR) and 95% confidence intervals (CI) for lung cancer among a subcohort of Multiethnic Cohort (MEC) Study current smokers - overall and by race/ethnicity
	ASIR	95% CI
Overall (n=140)	608	(539.1-676.9)
African Americans (n=29)	1026.2	(789.6-1262.8)
Native Hawaiians (n=31)	1136.9	(794.7-1479.1)
Whites (n=26)	1197.5	(905.4-1489.6)
Latinos (n=15)	236.9	(148.4-325.4)
Japanese Americans (n=39)	599.3	(465.4-733.1)
Footnote: Age-standardized incidence rates (ASIRs) were left truncated at age 45 and age-standardized using the United States 2000 standard population
